# Supplementary material
Source: publisher site journal article supplement (https://www.dovepress.com/article/388410)
Supplement: Supplementary file 1 [file get_supplementary_file.php]

**Supplementary Table 1 - Search strategy**

| **Systematic review of literature conducted on 24th November 2023** | |
| --- | --- |
| **Original research of Ublituximab in MS** | N=6 |
| **Reviews:** |  |
| Use of all disease modifying treatments in MS | N=3 |
| Use of anti-CD20 treatments in MS | N=15 |
| Use of ublituximab in MS | N=6 |
| **Other:** |  |
| Meta-analysis of B-cell therapies and incidence of headache | N=1 |
| Review of secondary hypogammaglobulinemia with B-cell therapies | N=1 |
| Review of the health economic benefits of B-cell therapies | N=1 |
| Progressive multifocal leukoencephalopathy and B-cell therapies | N=1 |
| Medical letter | N=1 |
|  | **N=35** |

*Based on the papers identified from this search strategy, additional revenant studies and reviews were then identified and included in our references.*
